# Supplementary material for: A family of linear phenolic polymers with controlled hydrophobicity, adsorption and antioxidant properties
Source: Royal Society of Chemistry journal article supplement (doi:10.1039/c7py01973d), 2017-12-26
Supplement: c7py01973d1.pdf [file c7py01973d1.pdf]

## Supporting Information

### A Family of Linear Phenolic Polymers with Controlled Hydrophobicity, Adsorption and Antioxidant Properties

Raman Hlushko,<sup>a</sup> Hanna Hlushko,<sup>a</sup> and Svetlana A. Sukhishvili\*<sup>a</sup>

<sup>a</sup>Department of Materials Science and Engineering, Texas A&M University, RDMC 3003

TAMU, College Station, TX, 77843-3003. E-mail: [svetlana@tamu.edu](mailto:svetlana@tamu.edu)

**Tables S1-S3.** Specific amounts of monomers and deprotecting agents used for synthesis of antioxidant polymers of targeted compositions.

**Table S1.** P2H<sub>z</sub>Hex series and PHex

| Targeted molar content, % | Polymerization                                                                                                      |                                                                                                                                     | Yield (%) | Deprotection reaction |                                                        |
|---------------------------|---------------------------------------------------------------------------------------------------------------------|-------------------------------------------------------------------------------------------------------------------------------------|-----------|-----------------------|--------------------------------------------------------|
|                           | 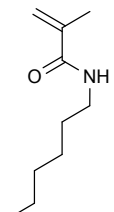<br>N-hexyl methacrylamide<br>(1) | <br>N-(3,4-dimethoxybenzyl) methacrylamide<br>(5) |           | Polymer               | 2M BBr <sub>3</sub> in CH <sub>2</sub> Cl <sub>2</sub> |
| 0                         | 1.94 g                                                                                                              | -                                                                                                                                   | 88        | -                     | -                                                      |
| 5                         | 1.84 g                                                                                                              | 0.135 g                                                                                                                             | 83        | 0.500 g               | 0.300 mL                                               |
| 10                        | 1.75 g                                                                                                              | 0.270 g                                                                                                                             | 83        | 0.509 g               | 0.500 mL                                               |
| 15                        | 1.65 g                                                                                                              | 0.405 g                                                                                                                             | 77        | 0.520 g               | 0.700 mL                                               |
| 100                       | -                                                                                                                   | 2.70 g                                                                                                                              | 73        | 0.680 g               | 4.50 mL                                                |

**Table S2.** PBrH<sub>z</sub>Hex series

| Targeted molar content, % | Polymerization                                                                                                            |                                                                                                                                                   |           | Deprotection reaction |                                                        |
|---------------------------|---------------------------------------------------------------------------------------------------------------------------|---------------------------------------------------------------------------------------------------------------------------------------------------|-----------|-----------------------|--------------------------------------------------------|
|                           | 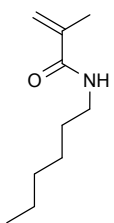<br>N-hexyl methacrylamide<br><b>(1)</b> | <br>N-(3,4-dimethoxy-5-bromobenzyl) methacrylamide<br><b>(6)</b> | Yield (%) | Polymer               | 2M BBr <sub>3</sub> in CH <sub>2</sub> Cl <sub>2</sub> |
| 5                         | 1.84 g                                                                                                                    | 0.180 g                                                                                                                                           | 75        | 0.500 g               | 0.300 mL                                               |
| 10                        | 1.75 g                                                                                                                    | 0.361 g                                                                                                                                           | 73        | 0.532 g               | 0.500 mL                                               |
| 15                        | 1.65 g                                                                                                                    | 0.541 g                                                                                                                                           | 68        | 0.550 g               | 0.700 mL                                               |
| 100                       | -                                                                                                                         | 3.60 g                                                                                                                                            | 59        | 0.910 g               | 4.50 mL                                                |

**Table S3.** P3H<sub>z</sub>Hex series

| Targeted molar content, % | Polymerization                                                                                                              |                                                                                                                                                |           | Deprotection reaction |                                                        |
|---------------------------|-----------------------------------------------------------------------------------------------------------------------------|------------------------------------------------------------------------------------------------------------------------------------------------|-----------|-----------------------|--------------------------------------------------------|
|                           | 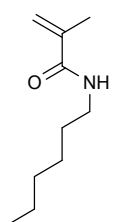<br>N-hexyl methacrylamide<br><b>(1)</b> | <br>N-(3,4,5-trimethoxybenzyl) methacrylamide<br><b>(7)</b> | Yield (%) | Polymer               | 2M BBr <sub>3</sub> in CH <sub>2</sub> Cl <sub>2</sub> |
| 5                         | 1.84 g                                                                                                                      | 0.152 g                                                                                                                                        | 81        | 0.503 g               | 0.400 mL                                               |
| 10                        | 1.75 g                                                                                                                      | 0.307 g                                                                                                                                        | 79        | 0.517 g               | 0.700 mL                                               |
| 15                        | 1.65 g                                                                                                                      | 0.457 g                                                                                                                                        | 82        | 0.530 g               | 1.00 mL                                                |
| 100                       | -                                                                                                                           | 3.04 g                                                                                                                                         | 76        | 0.770 g               | 6.50 mL                                                |

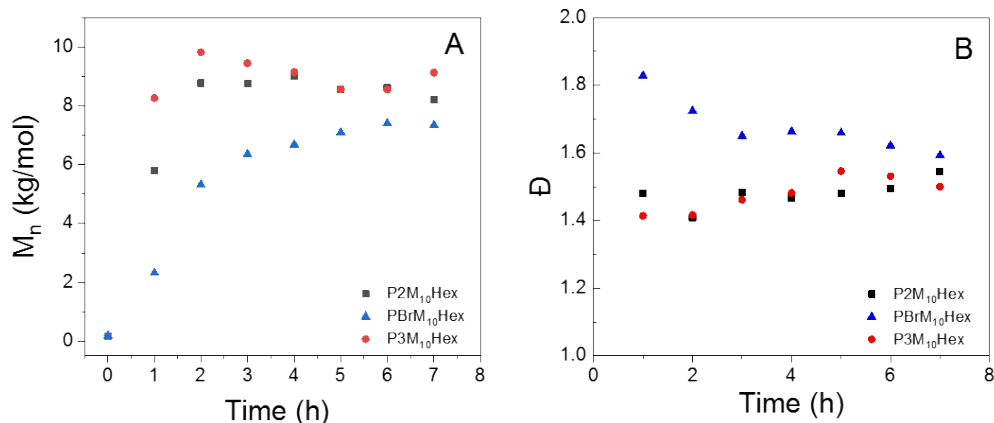

**Fig. S1.** The number-average molecular weight  $M_n$  (A) and molar mass dispersities (B) as a function of polymerization time during synthesis of P2M<sub>10</sub>Hex, PBrM<sub>10</sub>Hex, or P3M<sub>10</sub>Hex at 80°C.

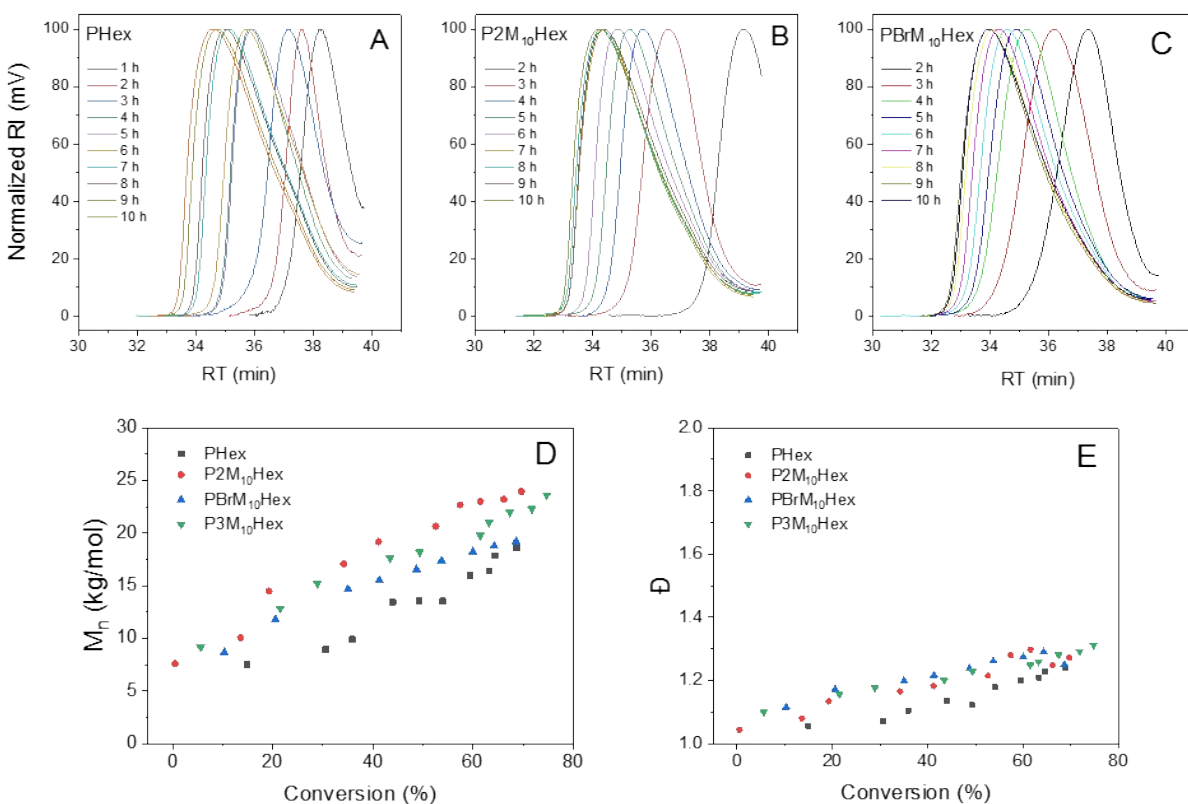

**Fig. S2.** GPC traces of PHex (A), P2M<sub>10</sub>Hex (B), PBrM<sub>10</sub>Hex (C) for different polymerization times, as well as  $M_n$  (D) and molar mass dispersities (E) as a function of monomer conversion during polymerization of PHex homopolymer and copolymers containing 10% of phenolic precursor groups at 70°C.

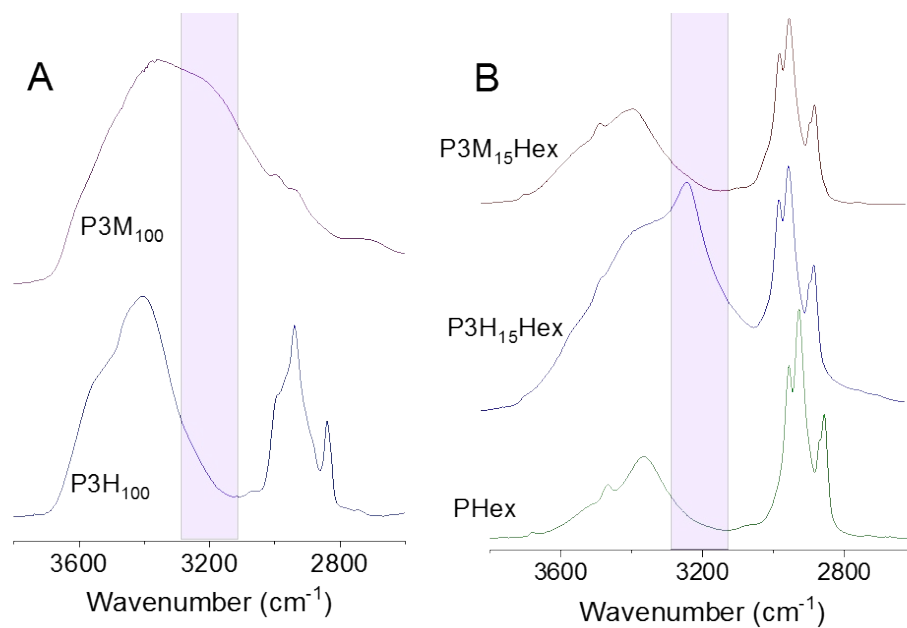

**Fig. S3.** FTIR spectra of protected and deprotected P3M<sub>100</sub> and P3H<sub>100</sub> homopolymers (A), P3M<sub>15</sub>Hex and P3H<sub>15</sub>Hex copolymers (B, top) and PHex control polymer (B, bottom).

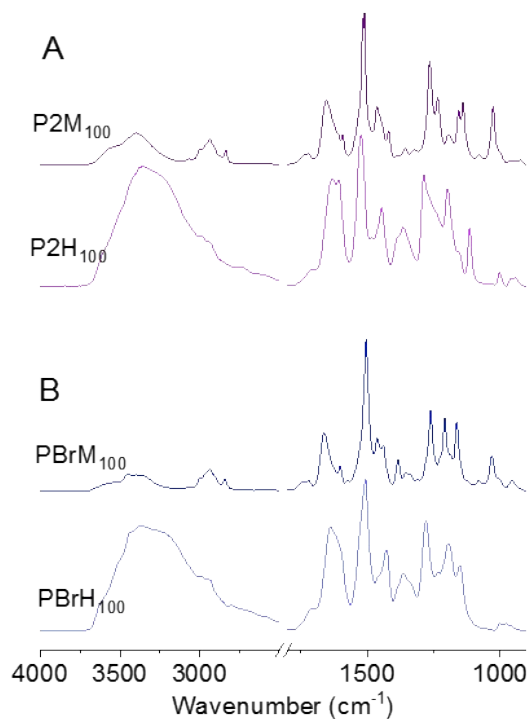

**Fig. S4.** FTIR spectra of protected and deprotected homopolymers: P2M<sub>100</sub> and P2H<sub>100</sub> (A), and PBrM<sub>100</sub> and PBrH<sub>100</sub> (B).

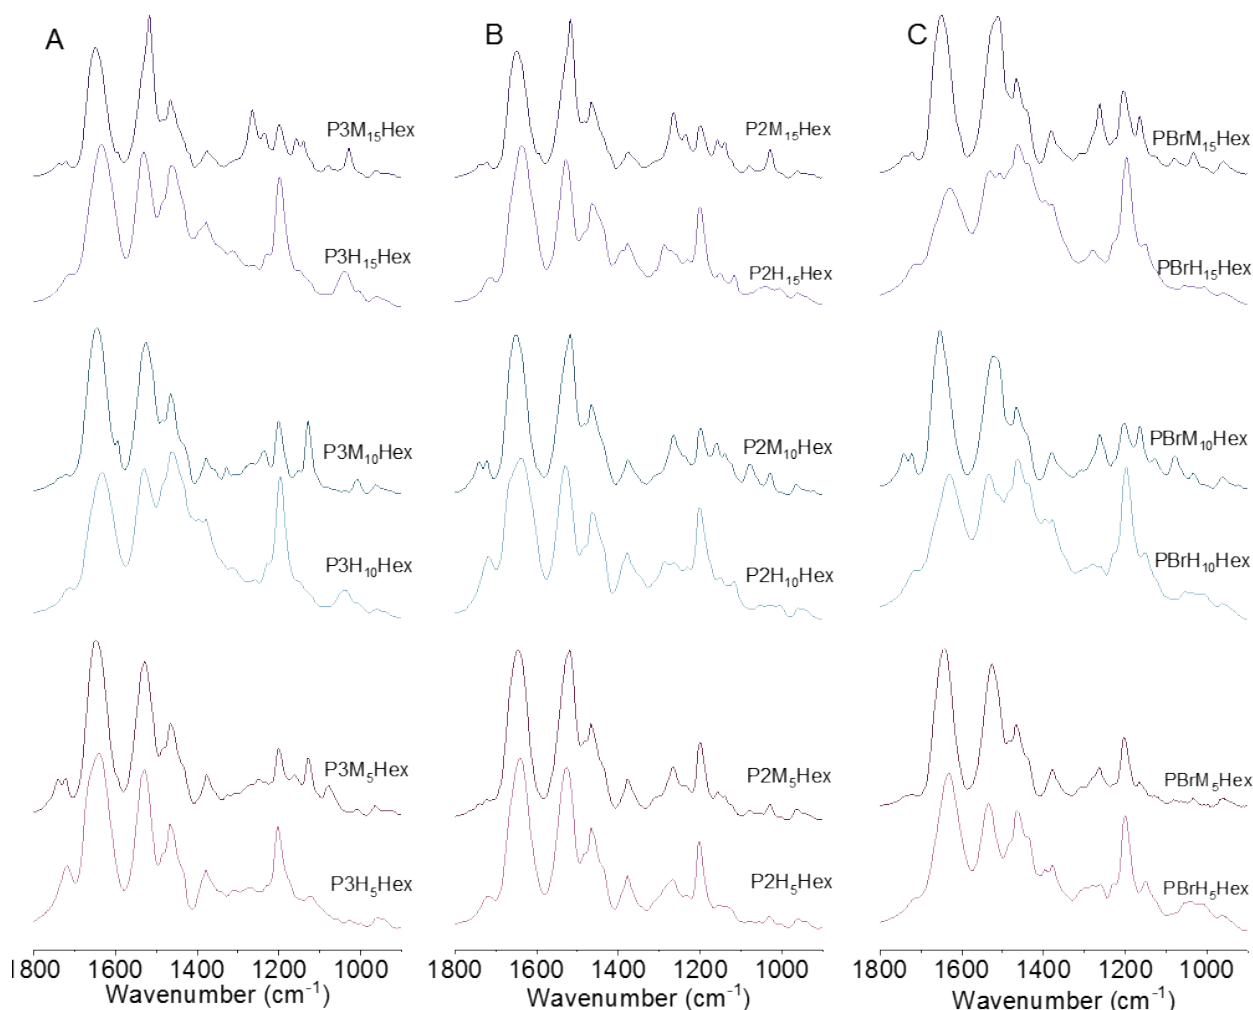

**Fig. S5.** FTIR spectra of the copolymers of P3M<sub>Z</sub>Hex and P3H<sub>Z</sub>Hex series (A), P2M<sub>Z</sub>Hex and P2H<sub>Z</sub>Hex series (B), as well as PBrM<sub>Z</sub>Hex and PBrH<sub>Z</sub>Hex series (C).

**TGA analysis.** TGA data indicated the overall similar behavior of all polymers in the temperature range below 200 °C, *i.e.* phenol-containing polymers showed an initial small loss of mass upon heating up to ~100 °C, and retained their mass when further heated to 200°C. Specifically, for homopolymers, the mass loss due to dehydration was ~2, 5, 7 and 10% for PHex, PBrH<sub>100</sub>, P2H<sub>100</sub>, and P3H<sub>100</sub>, respectively. Heating to temperatures significantly higher than 150 °C revealed dramatic differences in the thermal behavior of phenol-containing and phenol-free polymers, as shown in Fig. S6. In particular, phenol-free hexyl homopolymer demonstrated a single wide decomposition step with an onset temperature at 210°C, with the fastest decomposition between

390 °C and 410 °C. In contrast, all phenolic copolymers showed two-step decomposition profiles. The first step in the temperature range between 250 and 300 °C, also seen for phenolic homopolymers, most likely corresponds to crosslinking/decomposition that involves polyphenolic rings. The mass loss of phenolic homopolymers lacked this high-temperature decomposition peak, but instead showed a continuous and gradual mass loss at temperatures between 200 and 500 °C, leaving behind high percentage (42% - 55%) of solid residues after heating to 500 °C.

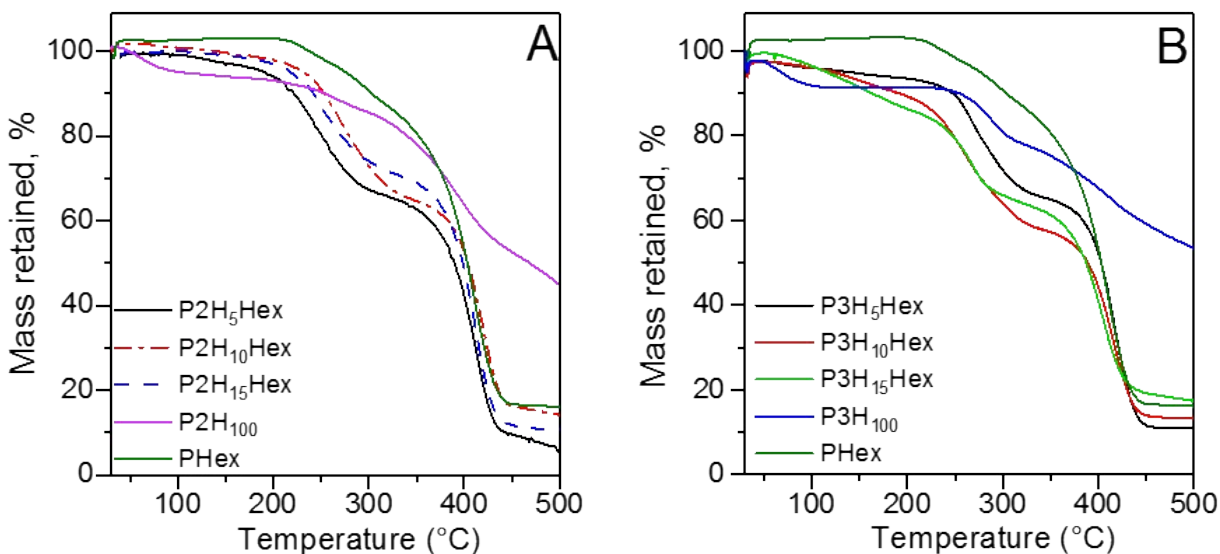

**Fig. S6.** TGA analysis of P2H<sub>Z</sub>Hex (A) and P3H<sub>Z</sub>Hex (B) polymer series.
